# Supplementary material
Source: ML conference proceedings conference paper supplement (https://openreview.net/forum?id=oiEyxnMrF0)
Supplement: supplementary_material [file attachment]

# Supplementary Materials: SelM: Selective Mechanism based Audio-Visual Segmentation

Anonymous Author(s)

This supplementary material mainly includes two aspects:

- (1) More details on DAM and BCSM (Figure 1 and Figure 2).
- (2) More experimental results.
  - Qualitative comparisons on S4 setting (Figure 3);
  - Ablations on AVSS setting (Table 1);
  - Ablations on fusion stages (Table 2);
  - Ablations on auxiliary loss coefficient (Table 3);
  - Parameters about SelM (Table 4);
  - Ablation study on Learnable Query Dimensions (Table 5);
  - Various initialization techniques (Table 6);
  - Ablation study on DAM under AVSS setting (Table 7);
  - Ablation study on BCSM under AVSS setting (Table 8).

```
def DAM_A2VBlock(x, # Visual Feature [B T C H W]
                 y # Audio Feature [B T C 1]
                 ):
    x = reshape(x) # [B T H*W C]
    x = Dropout(Gelu(Conv1d(x))) # align
    y = Conv1d(y) # align

    # compute sim_map(visual as query, audio as key and value)
    sim_map = cross_attention(x, y) # [B T 1 H*W 1]

    # get the weighted audio feature
    y = reshape(y) # [B T 1 1 C]
    y = reshape(sim_map*y) # [B T H*W C]
    y = Norm(Conv1d(y)) # align

    # conduct a multiply of weighted audio and visual Feature
    x = x*y # [B T H*W C]
    x = Dropout(Gelu(Conv1d(x))) # output the Aligned Feature

    return x
```

**Figure 1: Example of DAM-A2VBlock Algorithm.** This pseudocode outlines the steps for aligning audio and visual features.

| Method      | AVSS           |                |
|-------------|----------------|----------------|
|             | $M_J \uparrow$ | $M_F \uparrow$ |
| w.o.DAM     | 31.2(-0.7)     | 36.4(-0.8)     |
| w.o.BCSM    | 30.3(-1.6)     | 35.4(-1.8)     |
| w.o.CLEVER  | 28.4(-3.5)     | 33.2(-4.0)     |
| <b>SelM</b> | <b>31.9</b>    | <b>37.2</b>    |

**Table 1: Comparative Analysis of Module Performance.**

```
def BCSM_A2V_Sem(x, # Visual Feature [B T C H W]
                 y # Audio Feature [B T C]
                 ):
    # pass the audio feature through the vanilla mamba block
    # with the layernorm and skip-connection
    y = y+mamba(Norm(y)) # for three layers

    # the shape of y : [B T C]
    # use linear layer for align
    # use SiLU layer for map features to [0,1]
    audio_gate = SiLU(linear(y)) # [B T C]

    # conduct a multiply for audio gate and Visual Feature
    # with skip-connection
    x = x+audio_gate*x

    return x
```

**Figure 2: Illustration of the BCSM-A2V\_Sem Procedure.** The pseudocode details the process for enhancing audio-visual correspondence through a mamba block with layer normalization and skip connections. It includes a SiLU-activated linear layer for feature mapping, followed by an audio gating mechanism to integrate audio and visual features.

| Stage                | S4             |                | MS3            |                |
|----------------------|----------------|----------------|----------------|----------------|
|                      | $M_J \uparrow$ | $M_F \uparrow$ | $M_J \uparrow$ | $M_F \uparrow$ |
| 1                    | 81.5(-2.0)     | 89.9(-1.3)     | 55.9(-4.4)     | 67.1(-4.2)     |
| 1+2                  | 81.4(-2.1)     | 89.7(-1.5)     | 56.6(-3.7)     | 67.9(-3.4)     |
| 1+2+3                | 81.6(-1.9)     | 89.9(-1.3)     | 57.0(-3.3)     | 67.3(-4.0)     |
| 4                    | 81.9(-1.6)     | 89.8(-1.4)     | 57.2(-3.1)     | 67.8(-3.5)     |
| 4+3                  | 81.5(-2.0)     | 89.9(-1.3)     | 57.8(-2.5)     | 69.3(-2.0)     |
| 4+3+2                | 81.6(-1.9)     | 89.9(-1.3)     | 57.3(-3.0)     | 67.8(-3.5)     |
| <b>1+2+3+4(SelM)</b> | <b>83.5</b>    | <b>91.2</b>    | <b>60.3</b>    | <b>71.3</b>    |

**Table 2: Evaluation of Sequential Stages.** Stages 1 to 4 represent the four stages of the video encoder and audio encoder, respectively.

| Coefficient    | S4             |                | MS3            |                |
|----------------|----------------|----------------|----------------|----------------|
|                | $M_J \uparrow$ | $M_F \uparrow$ | $M_J \uparrow$ | $M_F \uparrow$ |
| 0.5            | 82.9(-0.6)     | 90.8(-0.4)     | 59.9(-0.4)     | 70.2(-1.1)     |
| <b>1(SelM)</b> | <b>83.5</b>    | <b>91.2</b>    | <b>60.3</b>    | <b>71.3</b>    |
| 1.5            | 82.7(-0.8)     | 90.9(-0.3)     | 59.6(-0.7)     | 70.3(-1.0)     |
| 2.0            | 82.8(-0.7)     | 90.5(-0.7)     | 59.9(-0.4)     | 70.3(-1.0)     |

**Table 3: Ablation study on aux loss coefficient.**

| Method      | AVSS           |                |
|-------------|----------------|----------------|
|             | $M_J \uparrow$ | $M_F \uparrow$ |
| A2V-SeM     | 31.1(-0.8)     | 36.6(-0.6)     |
| V2A-SeM     | 30.0(-1.9)     | 35.5(-1.7)     |
| <b>BCSM</b> | <b>31.9</b>    | <b>37.2</b>    |

Table 8: Ablation study on BCSM directions under AVSS setting.

| Method      | Params        |
|-------------|---------------|
| DAM         | 4.81M         |
| BSCM        | 11.31M        |
| CLEVER      | 11.63M        |
| AVSegformer | 186.1M(+4.2)  |
| <b>SelM</b> | <b>181.9M</b> |

Table 4: Parameters about SelM.

| Query dim        | S4             |                | MS3            |                |
|------------------|----------------|----------------|----------------|----------------|
|                  | $M_J \uparrow$ | $M_F \uparrow$ | $M_J \uparrow$ | $M_F \uparrow$ |
| 128              | 83.2(-0.3)     | 90.5(-0.7)     | 60.0(-0.3)     | 70.3(-1.0)     |
| <b>256(SelM)</b> | <b>83.5</b>    | <b>91.2</b>    | <b>60.3</b>    | <b>71.3</b>    |
| 512              | 83.0(-0.5)     | 90.5(-0.7)     | 59.3(-1.0)     | 69.9(-1.4)     |

Table 5: Ablation study on Learnable Query Dimension in CLEVER.

| Method   | From Scratch   |                | Pretrain on S4    |                   |
|----------|----------------|----------------|-------------------|-------------------|
|          | $M_J \uparrow$ | $M_F \uparrow$ | $M_J \uparrow$    | $M_F \uparrow$    |
| SelM-R50 | 54.5           | 65.6           | <b>58.4(+3.9)</b> | <b>70.7(+5.1)</b> |
| SelM-PVT | 60.3           | 71.3           | <b>63.4(+3.1)</b> | <b>73.3(+2.0)</b> |

Table 6: Ablation study on Various Initialization Techniques.

| Method     | AVSS           |                |
|------------|----------------|----------------|
|            | $M_J \uparrow$ | $M_F \uparrow$ |
| A2V Block  | 29.9(2.0)      | 35.0(-2.2)     |
| V2A Block  | 29.3(-2.6)     | 34.1(-3.1)     |
| <b>DAM</b> | <b>31.9</b>    | <b>37.2</b>    |

Table 7: Ablation study on DAM directions under AVSS setting.

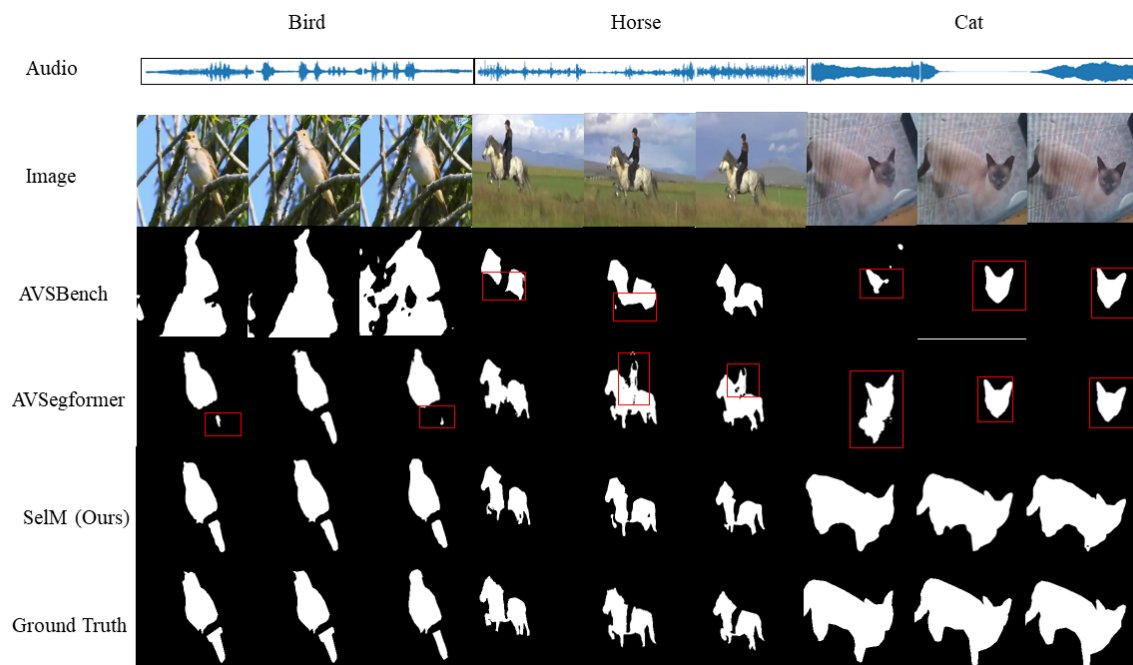

Figure 3: Qualitative Comparisons on S4 Setting.
